# Supplementary material
Source: PubMed Central journal article supplement (PMC4931310)
Supplement: Supp_Figure1.pdf [file Supp_Figure1.pdf]

## Supplementary Data

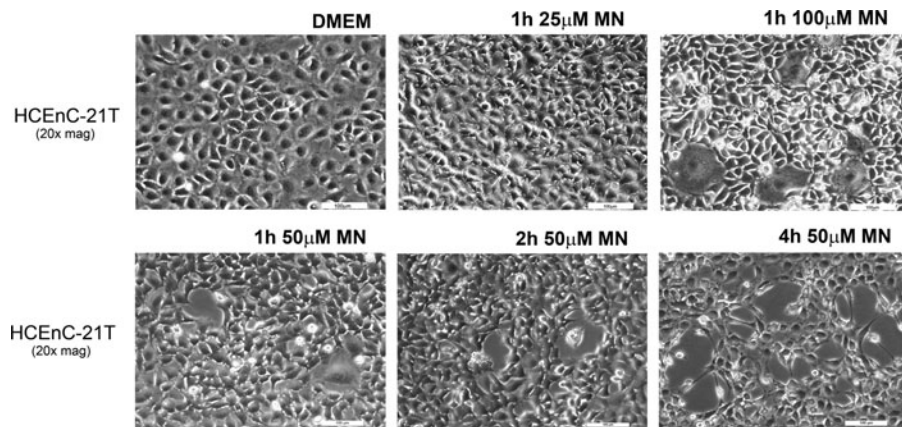

**SUPPLEMENTARY FIG. S1. Time- and dose-dependent analysis of MN-induced rosette formation.** HCEnC-21T cells were treated with various doses of MN at 1 h (*top images*, 50  $\mu$ M is seen in the *lower image*). DMEM was the control (basal media, untreated). Time-dependent analysis of rosette formation is shown at 1, 2, and 4 h with 50  $\mu$ M MN (*lower images*). Shown are representative images of at least three independent experiments. HCEnC, human corneal endothelial cell; MN menadione.
