# Supplementary material
Source: PubMed Central journal article supplement (PMC4931310)
Supplement: Supp_Figure2.pdf [file Supp_Figure2.pdf]

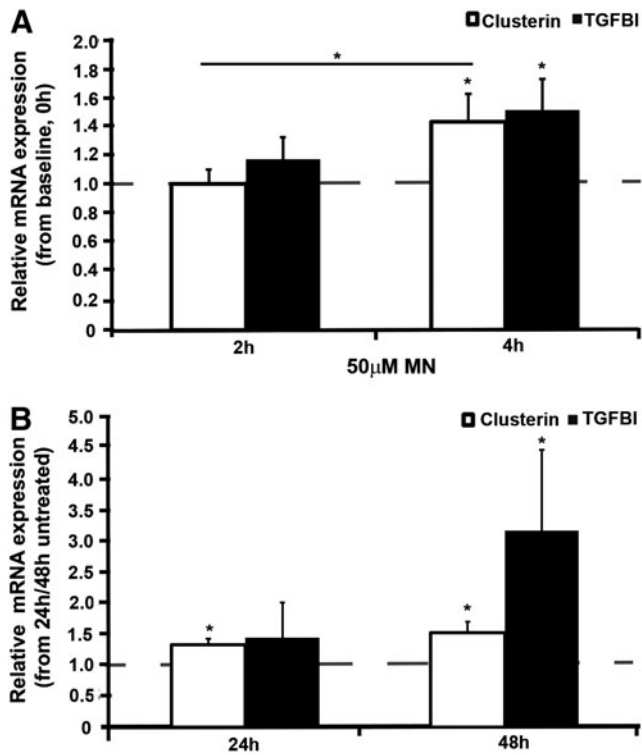

**SUPPLEMENTARY FIG. S2. qPCR analysis of gene expression after acute and chronic MN treatment. (A)** Relative mRNA expression of *CLU* and *TGFBI* with 50 μM MN for 2 and 4 h ( $n=3$ ). **(B)** Relative mRNA expression of *CLU* and *TGFBI* during chronic exposure with 10 μM MN for 24 and 48 h ( $n=3$ ). qPCR data were normalized to housekeeping gene, *GAPDH*. Data are expressed as the mean ± SE. Student's *t*-test was applied for statistical significance. \* $p < 0.05$  (from control, 0, 24, or 48 h). *CLU*, clusterin; *TGFBI*, transforming growth factor, beta-induced.
