# Supplementary material
Source: PubMed Central journal article supplement (PMC4931310)
Supplement: Supp_Figure3.pdf [file Supp_Figure3.pdf]

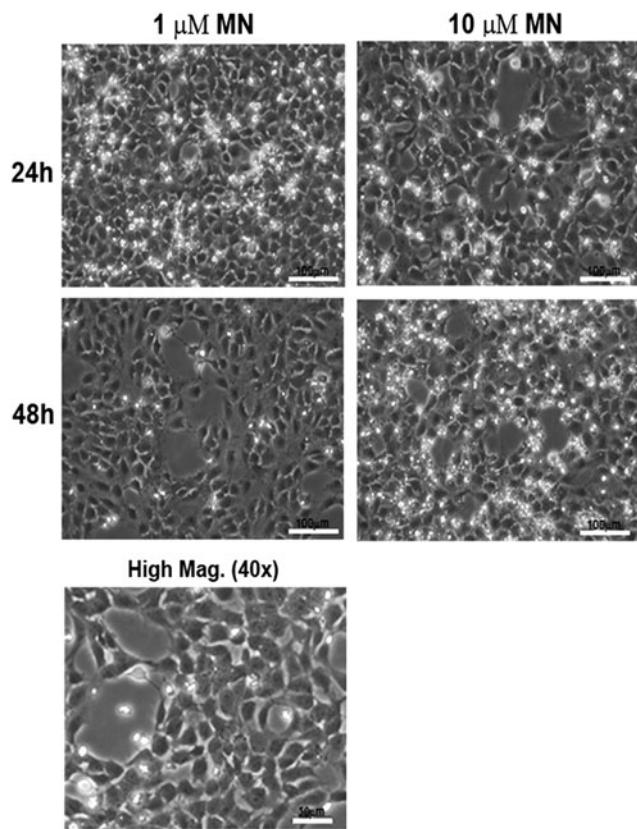

**SUPPLEMENTARY FIG. S3. Rosette formation due to chronic exposure to MN.** HCEnc-21T cells were treated with a low dose of 1  $\mu\text{M}$  MN and 10  $\mu\text{M}$  MN for 24 and 48 h. Phase-contrast images (low and high magnification) were acquired at the indicated time points, displaying rosette formation. Shown are representative images of at least three independent experiments.
