# Supplementary material
Source: PubMed Central journal article supplement (PMC4931310)
Supplement: Supp_Figure4.pdf [file Supp_Figure4.pdf]

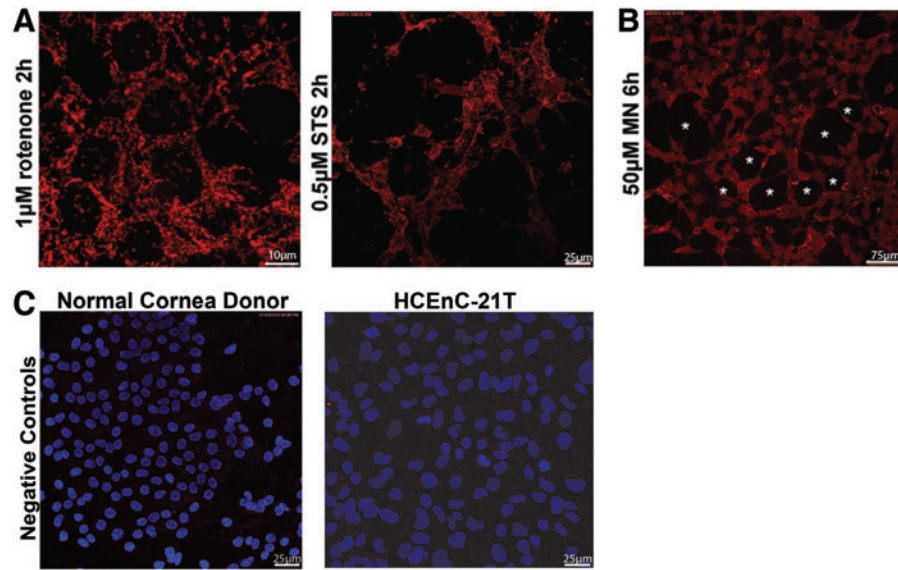

**SUPPLEMENTARY FIG. S4. Immunostaining controls for mitochondrial fragmentation in HCEnc-21T and normal cornea tissue.** (A) Mitochondrial fragmentation after treating HCEnc-21T cells with 1  $\mu$ M rotenone for 2 h, which was used as a positive control. Similarly, application of STS led to cytochrome *c* release and served as a positive control for apoptosis. (B) Low-magnification images revealed widespread formation of rosettes (indicated by \*) and generalized release of cytochrome *c* at 6 h with 50  $\mu$ M MN. (C) Negative control staining of normal human corneal endothelium specimen (74 M, left image) and HCEnc-21T cells (right image). STS, staurosporine.
